# Supplementary material for: Bulk assembly of a 0D organic antimony chloride hybrid with highly efficient orange dual emission by self-trapped states
Source: Royal Society of Chemistry journal article supplement (doi:10.1039/d1tc02906a), 2021-01-01
Supplement: d1tc02906a1.pdf [file d1tc02906a1.pdf]

## Supporting Information

### **Bulk assembly of 0D organic antimony chloride hybrid with highly efficient orange dual-emission by self-trapped states**

Hui Peng,<sup>a,b,c,d</sup> Ye Tian,<sup>a</sup> Xinxin Wang,<sup>a</sup> Tao Huang,<sup>b</sup> Yonghao Xiao,<sup>d</sup> Tiantian Dong,<sup>c</sup> Jinming Hu,<sup>a</sup> Jianping Wang<sup>c\*</sup> and Bingsuo Zou<sup>b\*</sup>

<sup>a</sup>Beijing key laboratory of Nanophotonics and ultrafine Optoelectronic Systems, Beijing Institute of Technology, Beijing 100081, China.

<sup>b</sup>Guangxi Key Lab of Processing for Nonferrous Metals and Featured Materials and Key lab of new Processing Technology for Nonferrous Metals and Materials, Ministry of Education; School of Resources, Environments and Materials, Guangxi University, Nanning 530004, China.

<sup>c</sup>Beijing National Laboratory for Molecular Sciences, Institute of Chemistry, Chinese Academy of Sciences, Beijing 100190, China.

<sup>d</sup>School of Materials Science & Engineering, Beijing Institute of Technology, Beijing 100081, China.

\*Corresponding Author: E-mail: zoubs@gxu.edu.cn (B.Z.), jwang@iccas.ac.cn (J. W.)

Table S1. Crystal data and structure refinement for (TPA)<sub>2</sub>SbCl<sub>5</sub> single crystal.

| Empirical formula                           | C <sub>24</sub> H <sub>56</sub> Cl <sub>5</sub> N <sub>2</sub> Sb |
|---------------------------------------------|-------------------------------------------------------------------|
| Formula weight                              | 671.70                                                            |
| Temperature/K                               | 170.0(3)                                                          |
| Crystal system                              | triclinic                                                         |
| Space group                                 | P-1                                                               |
| a/Å                                         | 10.6100(2)                                                        |
| b/Å                                         | 10.7418(2)                                                        |
| c/Å                                         | 16.2363(3)                                                        |
| α/°                                         | 76.000(2)                                                         |
| β/°                                         | 74.827(2)                                                         |
| γ/°                                         | 72.614(2)                                                         |
| Volume/Å <sup>3</sup>                       | 1677.22(6)                                                        |
| Z                                           | 2                                                                 |
| ρ <sub>calc</sub> /cm <sup>3</sup>          | 1.330                                                             |
| μ/mm <sup>-1</sup>                          | 1.235                                                             |
| F(000)                                      | 700.0                                                             |
| Crystal size/mm <sup>3</sup>                | 0.22 × 0.21 × 0.15                                                |
| Radiation                                   | MoKα (λ = 0.71073)                                                |
| 2θ range for data collection/°              | 4.038 to 61.946                                                   |
| Index ranges                                | -14 ≤ h ≤ 14, -11 ≤ k ≤ 15, -23 ≤ l ≤ 23                          |
| Reflections collected                       | 25968                                                             |
| Independent reflections                     | 8994 [R <sub>int</sub> = 0.0289, R <sub>sigma</sub> = 0.0311]     |
| Data/restraints/parameters                  | 8994/0/297                                                        |
| Goodness-of-fit on F <sup>2</sup>           | 1.026                                                             |
| Final R indexes [I ≥ 2σ (I)]                | R <sub>1</sub> = 0.0230, wR <sub>2</sub> = 0.0530                 |
| Final R indexes [all data]                  | R <sub>1</sub> = 0.0255, wR <sub>2</sub> = 0.0543                 |
| Largest diff. peak/hole / e Å <sup>-3</sup> | 0.42/-0.43                                                        |

Table S2. Fractional Atomic Coordinates ( $\times 10^4$ ) and Equivalent Isotropic Displacement Parameters ( $\text{\AA}^2 \times 10^3$ ) for  $(\text{TPA})_2\text{SbCl}_5$  single crystal.  $U_{\text{eq}}$  is defined as 1/3 of the trace of the orthogonalised  $U_{\text{ij}}$  tensor.

| Atom | $x$        | $y$        | $z$        | $U(\text{eq})$ |
|------|------------|------------|------------|----------------|
| Sb1  | 6370.9(2)  | 3778.0(2)  | 7769.5(2)  | 22.38(3)       |
| Cl1  | 7993.3(4)  | 5246.0(4)  | 6754.3(2)  | 30.14(8)       |
| Cl2  | 4216.4(4)  | 5738.0(4)  | 7668.9(3)  | 42.06(10)      |
| Cl3  | 6264.2(4)  | 3265.6(5)  | 6460.6(2)  | 36.97(9)       |
| Cl4  | 4831.5(4)  | 2227.0(4)  | 8562.7(2)  | 30.90(8)       |
| Cl5  | 8433.2(4)  | 1748.5(4)  | 7951.0(3)  | 38.11(9)       |
| N1   | 6797.0(14) | 7895.7(12) | 8546.6(8)  | 27.2(3)        |
| C1   | 6884.6(18) | 6417.4(14) | 8793.2(10) | 29.6(3)        |
| C2   | 7041.4(19) | 5771.4(16) | 9709.0(10) | 34.0(3)        |
| C3   | 7028.1(19) | 4317.2(16) | 9858.8(11) | 36.3(4)        |
| C4   | 7917.1(17) | 8234.3(16) | 8795.6(10) | 32.4(3)        |
| C5   | 9335.8(19) | 7587(2)    | 8377.1(14) | 45.8(4)        |
| C6   | 10341(2)   | 7947(3)    | 8735.8(16) | 60.9(6)        |
| C7   | 5479.7(17) | 8688.1(15) | 9017.8(10) | 30.2(3)        |
| C8   | 4204.3(19) | 8692.9(19) | 8766.0(13) | 41.3(4)        |
| C9   | 2990(2)    | 9378(2)    | 9375.7(15) | 53.5(5)        |
| C10  | 6898.1(19) | 8234.3(15) | 7573.2(9)  | 31.6(3)        |
| C11  | 6862(2)    | 9669.1(16) | 7166.6(10) | 36.9(4)        |
| C12  | 7108(3)    | 9806.3(19) | 6195.1(11) | 56.6(6)        |
| N2   | 2235.3(12) | 3234.2(13) | 6265.2(8)  | 26.6(3)        |
| C13  | 2320.4(16) | 3289.6(17) | 7175.0(9)  | 30.8(3)        |
| C14  | 980.3(17)  | 3760.5(19) | 7764.8(10) | 35.6(4)        |
| C15  | 1208.5(19) | 3759(2)    | 8649.6(11) | 45.1(4)        |
| C16  | 1491.2(16) | 4561.1(16) | 5823.9(10) | 29.6(3)        |
| C17  | 2001(2)    | 5748.2(18) | 5798.3(12) | 42.4(4)        |
| C18  | 1049(2)    | 6987(2)    | 5412.1(16) | 58.3(6)        |
| C19  | 1454.6(17) | 2246.6(17) | 6289.9(11) | 34.2(3)        |
| C20  | 2018(2)    | 829(2)     | 6703.9(15) | 52.9(5)        |
| C21  | 1340(3)    | -80(2)     | 6487.5(17) | 66.2(7)        |
| C22  | 3674.6(15) | 2842.1(17) | 5767.5(10) | 30.9(3)        |
| C23  | 3846.3(19) | 2593(2)    | 4868.0(12) | 50.5(5)        |

|     |            |         |            |         |
|-----|------------|---------|------------|---------|
| C24 | 5288.5(19) | 2165(2) | 4444.9(12) | 48.6(5) |
|-----|------------|---------|------------|---------|

Table S3. Bond lengths for (TPA)<sub>2</sub>SbCl<sub>5</sub> single crystal.

| Atom | Atom | Length/Å   | Atom | Atom | Length/Å   |
|------|------|------------|------|------|------------|
| Sb1  | Cl1  | 2.6543(4)  | C10  | C11  | 1.516(2)   |
| Sb1  | Cl2  | 2.6150(4)  | C11  | C12  | 1.508(2)   |
| Sb1  | Cl3  | 2.3582(4)  | N2   | C13  | 1.5196(19) |
| Sb1  | Cl4  | 2.5669(4)  | N2   | C16  | 1.516(2)   |
| Sb1  | Cl5  | 2.6082(4)  | N2   | C19  | 1.517(2)   |
| N1   | C1   | 1.5212(19) | N2   | C22  | 1.5155(19) |
| N1   | C4   | 1.513(2)   | C13  | C14  | 1.512(2)   |
| N1   | C7   | 1.519(2)   | C14  | C15  | 1.518(2)   |
| N1   | C10  | 1.5161(18) | C16  | C17  | 1.515(2)   |
| C1   | C2   | 1.510(2)   | C17  | C18  | 1.519(3)   |
| C2   | C3   | 1.525(2)   | C19  | C20  | 1.517(3)   |
| C4   | C5   | 1.509(3)   | C20  | C21  | 1.520(3)   |
| C5   | C6   | 1.518(3)   | C22  | C23  | 1.503(2)   |
| C7   | C8   | 1.511(2)   | C23  | C24  | 1.485(3)   |
| C8   | C9   | 1.516(3)   |      |      |            |

Table S4. Bond angles for (TPA)<sub>2</sub>SbCl<sub>5</sub> single crystal.

| Atom | Atom | Atom | Angle/°     | Atom | Atom | Atom | Angle/°    |
|------|------|------|-------------|------|------|------|------------|
| Cl2  | Sb1  | Cl1  | 92.716(13)  | C4   | C5   | C6   | 109.67(18) |
| Cl3  | Sb1  | Cl1  | 84.465(13)  | C8   | C7   | N1   | 116.72(13) |
| Cl3  | Sb1  | Cl2  | 90.301(16)  | C7   | C8   | C9   | 109.34(16) |
| Cl3  | Sb1  | Cl4  | 87.676(14)  | N1   | C10  | C11  | 115.65(12) |
| Cl3  | Sb1  | Cl5  | 90.974(16)  | C12  | C11  | C10  | 108.78(14) |
| Cl4  | Sb1  | Cl1  | 172.012(12) | C16  | N2   | C13  | 111.48(12) |
| Cl4  | Sb1  | Cl2  | 88.744(14)  | C16  | N2   | C19  | 106.28(12) |
| Cl4  | Sb1  | Cl5  | 88.067(13)  | C19  | N2   | C13  | 110.83(12) |
| Cl5  | Sb1  | Cl1  | 90.636(13)  | C22  | N2   | C13  | 106.55(11) |
| Cl5  | Sb1  | Cl2  | 176.514(14) | C22  | N2   | C16  | 110.44(12) |
| C4   | N1   | C1   | 111.53(12)  | C22  | N2   | C19  | 111.33(12) |
| C4   | N1   | C7   | 106.46(11)  | C14  | C13  | N2   | 115.03(12) |
| C4   | N1   | C10  | 111.01(12)  | C13  | C14  | C15  | 109.60(14) |
| C7   | N1   | C1   | 110.99(12)  | C17  | C16  | N2   | 116.41(13) |
| C10  | N1   | C1   | 105.75(11)  | C16  | C17  | C18  | 108.31(16) |
| C10  | N1   | C7   | 111.19(12)  | C20  | C19  | N2   | 115.99(15) |
| C2   | C1   | N1   | 116.63(12)  | C19  | C20  | C21  | 109.28(19) |
| C1   | C2   | C3   | 109.55(13)  | C23  | C22  | N2   | 116.18(13) |
| C5   | C4   | N1   | 115.92(14)  | C24  | C23  | C22  | 112.29(15) |
| Cl2  | Sb1  | Cl1  | 92.716(13)  | C4   | C5   | C6   | 109.67(18) |

Table S4. Comparison of room temperature key photophysical parameters of  $(\text{TPA})_2\text{SbCl}_5$  with recently reported orange-emitting quantum dots (QDs) or phosphors.

| Components                                                                  | Emission peak (nm) | PLQY(%)   | Lifetime ( $\mu\text{s}$ ) | Pros and cons                | Ref.      |
|-----------------------------------------------------------------------------|--------------------|-----------|----------------------------|------------------------------|-----------|
| $(\text{TPA})_2\text{SbCl}_5$                                               | 610                | 95.3      | 5.3                        | stable, low-toxic, high PLQY | This work |
| $(\text{OAm})_2\text{SnBr}_4$                                               | 628                | 60        | 4.3                        | easily oxidized              | [1]       |
| $(\text{DAO})\text{Sn}_2\text{I}_6$ film                                    | 634                | 36        | 1.114                      | Water-Stable/low PLQY        | [2]       |
| $(\text{PMA})_3\text{InBr}_6$                                               | 610                | 35        | $\sim 1.25$                | low-toxic/low PLQY           | [3]       |
| $(\text{R/S-MBA})_4\text{Cu}_4\text{I}_4$                                   | 630                | 52.8/59.7 | $\sim 15.4/14.9$           | easily oxidized              | [4]       |
| $\text{C}_4\text{H}_{14}\text{N}_2\text{MnBr}_4$                            | 516, 623           | 10.39     | 3.6, 183.2                 | low-toxic/low PLQY           | [5]       |
| $(\text{C}_9\text{NH}_{20})_2\text{SbCl}_5$                                 | 590                | 98        | 4.2                        | low-toxic, high PLQY         | [6]       |
| $(\text{C}_6\text{N}_2\text{H}_{16})\text{SbCl}_5$                          | 613                | 25.3      | 1.06                       | low-toxic/low PLQY           | [7]       |
| $(\text{C}_6\text{N}_2\text{H}_{16})\text{SbCl}_5 \cdot \text{H}_2\text{O}$ | 620                | 39.6      | 1.22                       | low-toxic/low PLQY           | [7]       |
| $\text{Cs}_2\text{SnCl}_6:\text{Sb}^{3+}$ NCs                               | 438 and 615        | 8.25      | -                          | low-toxic/low PLQY           | [8]       |
| $\text{CsPb}_{0.835}\text{Mn}_{0.165}\text{Cl}_3$ QDs                       | $\sim 397$ and 615 | 34        | 847                        | Toxic and low PLQY           | [9]       |
| $\text{Cs}_2\text{AgInCl}_6:\text{Mn}^{2+}$ NCs                             | 620                | 16        | $\mu\text{s}$ level        | low-toxic/low PLQY           | [10]      |
| $\text{Cs}_4\text{MnBi}_2\text{Cl}_{12}$                                    | 610                | 25.7      | 144                        | low-toxic/low PLQY           | [11]      |

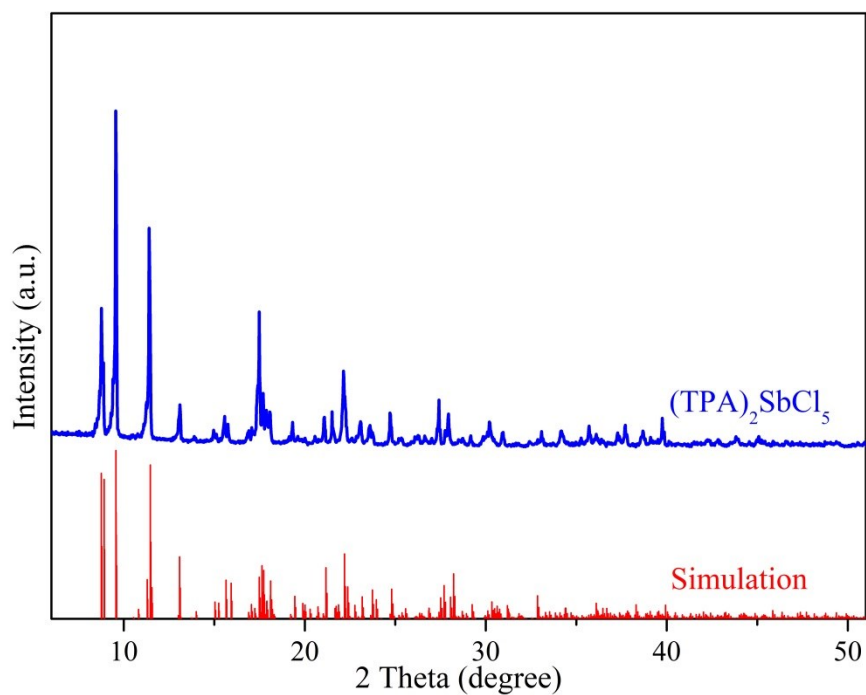

Figure S1. Experimental and simulated PXRD patterns of  $(\text{TPA})_2\text{SbCl}_5$ .

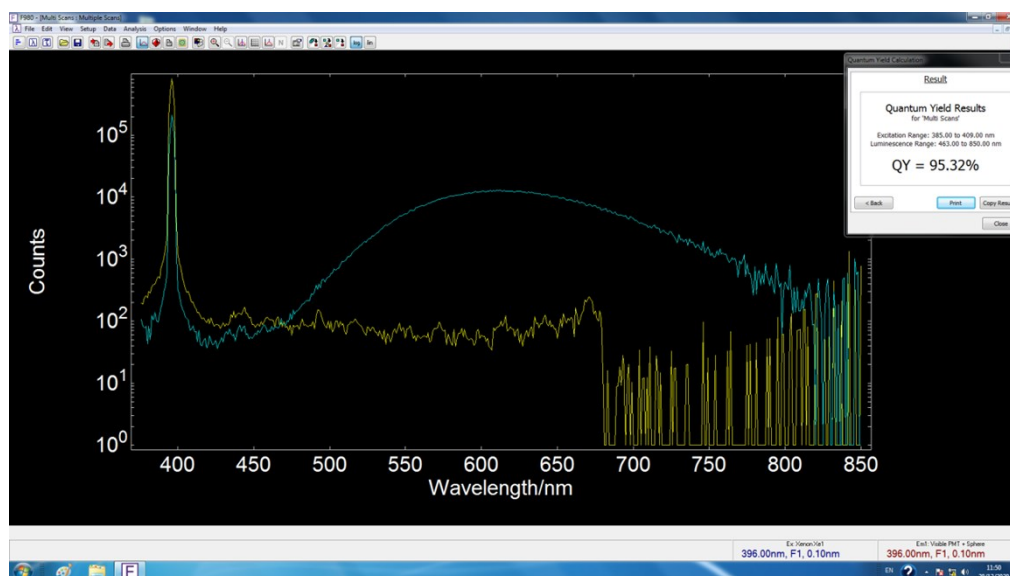

Figure S2. Absolute photoluminescence quantum yield measurement of the  $(\text{TPA})_2\text{SbCl}_5$  SCs.

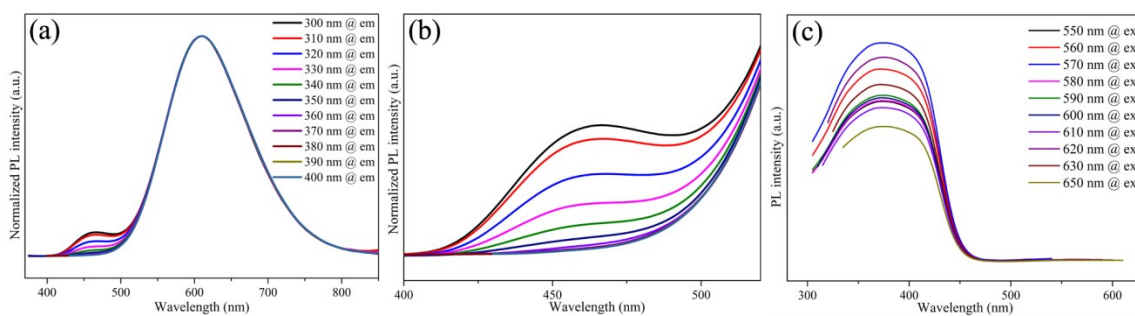

Figure S3. (a) Excitation-wavelength dependent photoluminescence (PL) spectra. (b) The Magnified area of the PL spectra in the wavelength range of 400-520 nm. (c) Emission-wavelength-dependent photoluminescence excitation (PLE) spectra of  $(\text{TPA})_2\text{SbCl}_5$  SCs at room temperature.

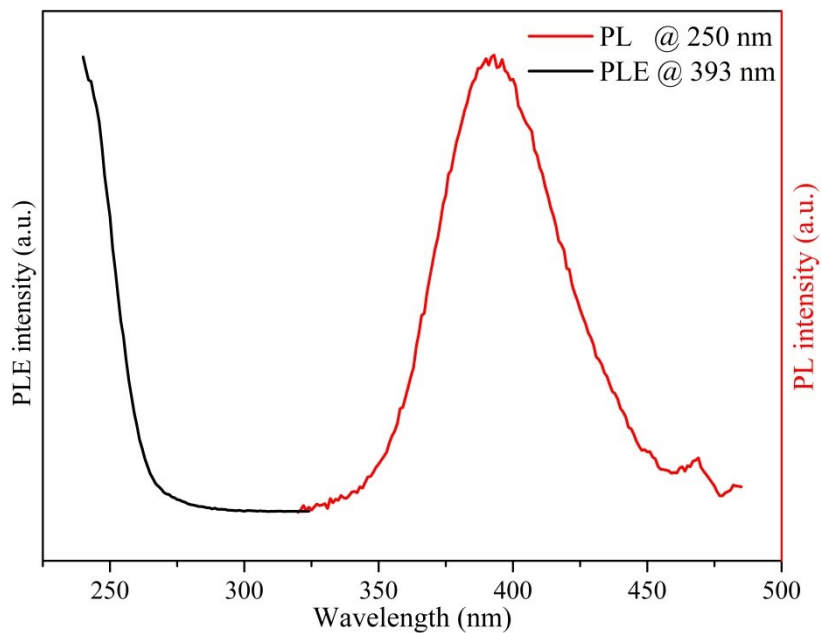

Figure S4. PL and PLE spectra of TPACl at RT. The emission peaks of TPACl appeared at around 393 nm.



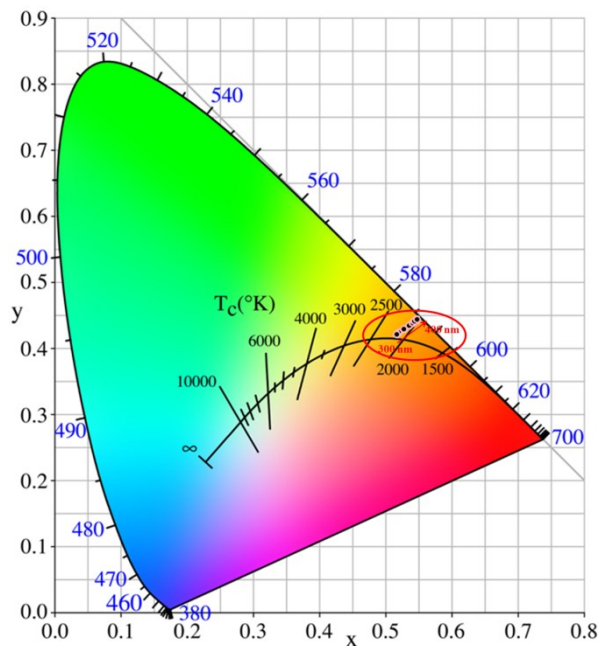

Figure S5. The Commission Internationale de l'Eclairage (CIE) chromaticity diagram of  $(\text{TPA})_2\text{SbCl}_5$  were calculated to evaluate the emission change quantitatively under different excitation wavelength from 300 to 400 nm.

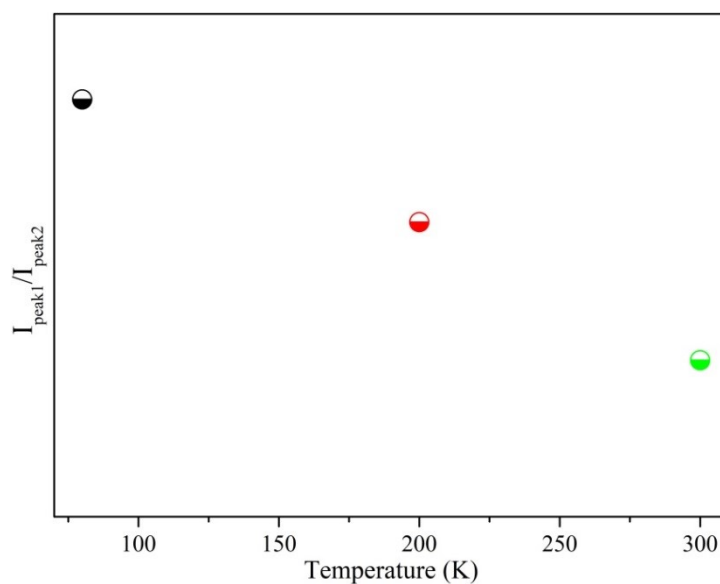

Figure S6.  $I_{\text{Peak1}}/I_{\text{Peak2}}$  extracted from low temperature-dependent PL spectra.

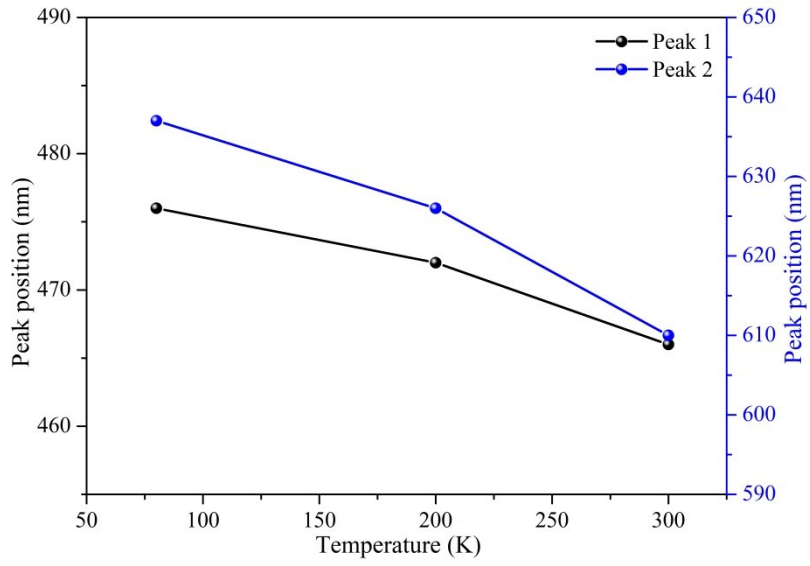

Figure S7. The PL peak position of  $(\text{TPA})_2\text{SbCl}_5$  SCs as a function of low temperature.

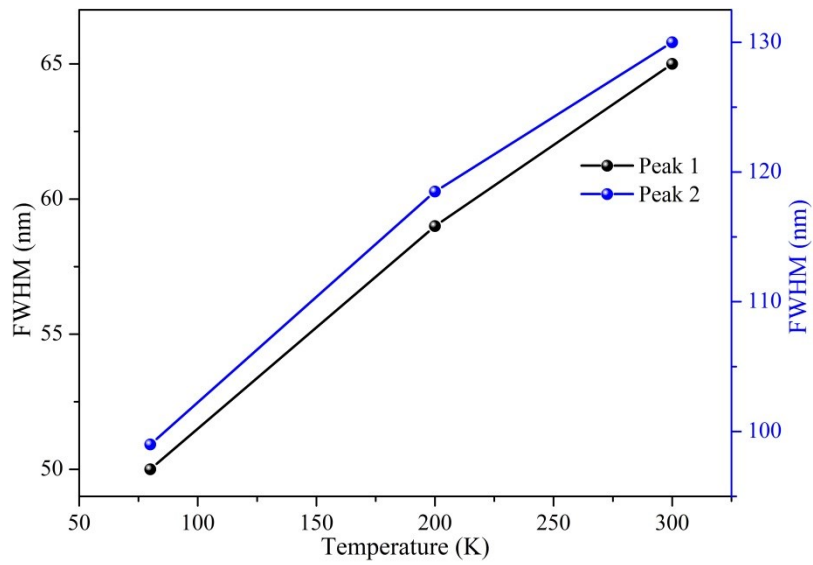

Figure S8. The FWHM of  $(\text{TPA})_2\text{SbCl}_5$  SCs as a function of low temperature.

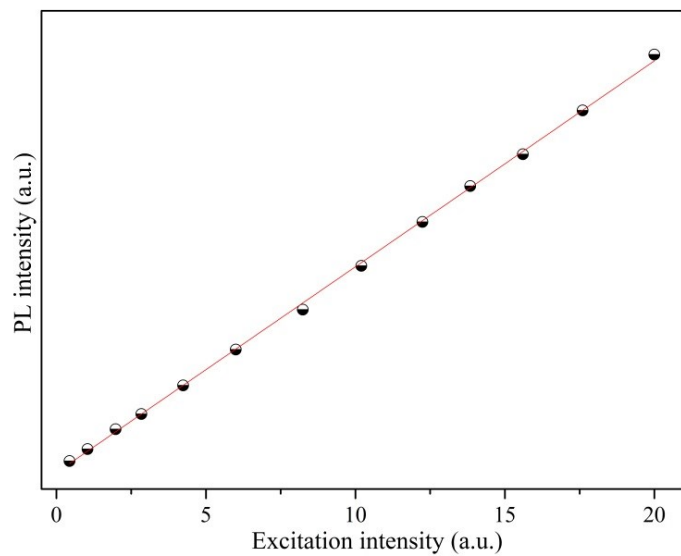

Figure S9. The PL intensity versus excitation power for  $(\text{TPA})_2\text{SbCl}_5$  SCs excited by 405 nm laser at room temperature.

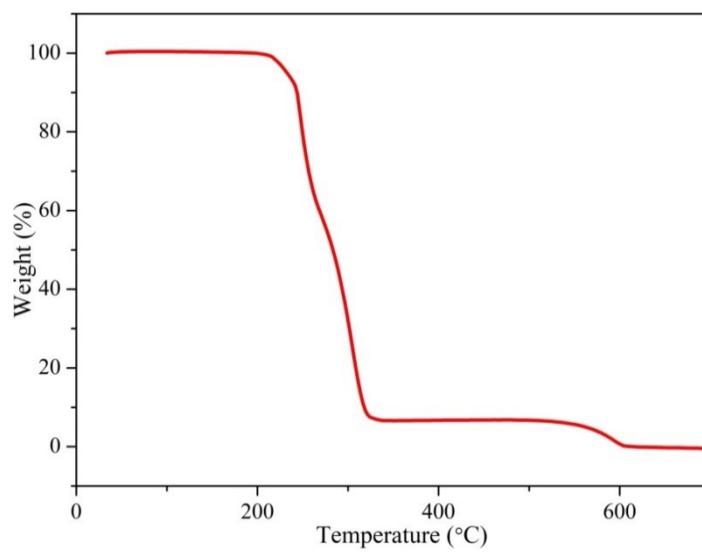

Figure S10. TG curve of  $(\text{TPA})_2\text{SbCl}_5$  powders.

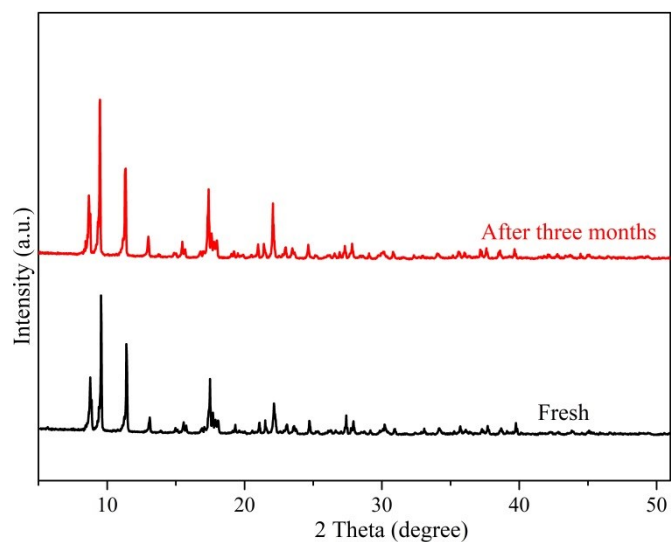

Figure S11. PXR D patterns of (TPA)<sub>2</sub>SbCl<sub>5</sub> before and after exposure to atmospheric environment (~50 % relative humidity) for three month.

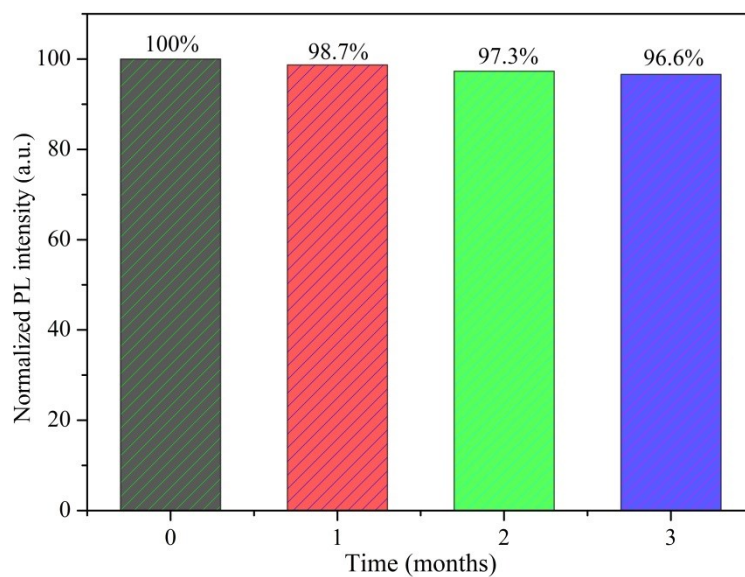

Figure S12. The PL intensity of (TPA)<sub>2</sub>SbCl<sub>5</sub> SCs at different times (~50 % relative humidity) within three months.

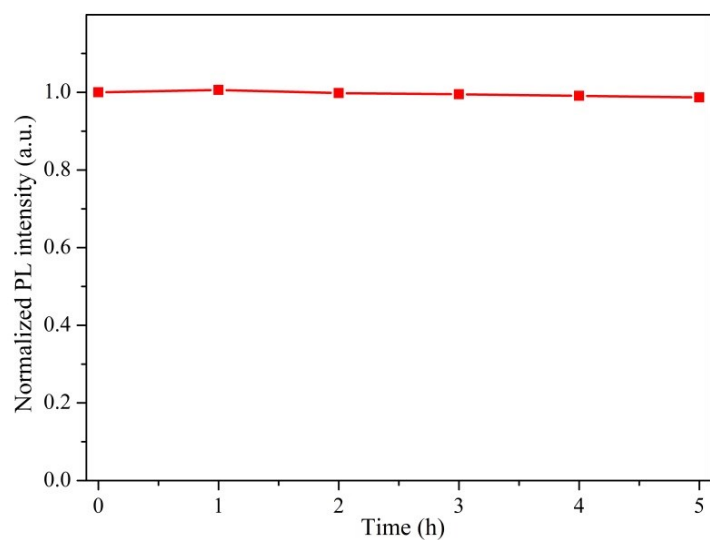

Figure S13. Long-term stability of (TPA)<sub>2</sub>SbCl<sub>5</sub> SCs under a 325 nm UV lamp within 5 h.

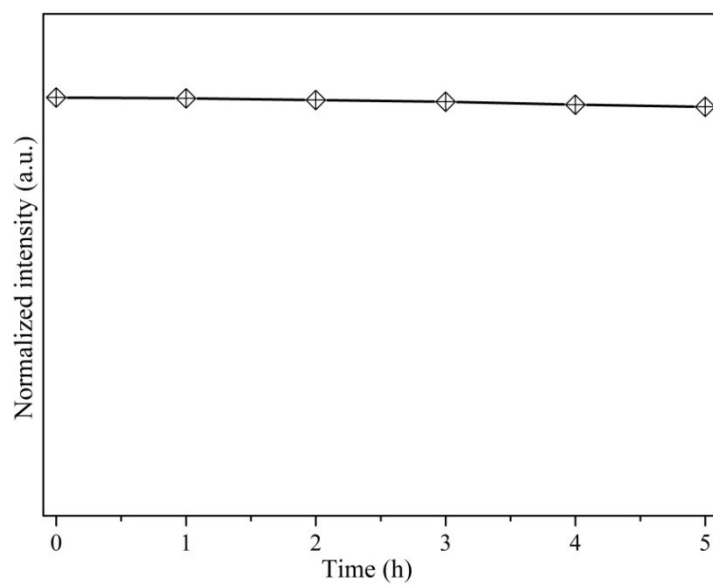

Figure S14. Long-term stability of WLED when it operates for 5 h.

1. L. Hou, Y. Zhu, J. Zhu and Chunzhong Li. Tuning Optical Properties of Lead-Free 2D Tin-Based Perovskites with Carbon Chain Spacers, *J. Phys. Chem. C*, 2019, **123**, 31279-31285.
2. I. Spanopoulos, I. Hadar, W. Ke, P. Guo, S. Sidhik, M. Kepenekian, J. Even, A. D. Mohite, R. D. Schaller and M. G. Kanatzidis, *J. Am. Chem. Soc.*, 2020, **142**, 9028-9038.
3. D. Chen, S. Hao, G. Zhou, C. Deng, Q. Liu, S. Ma, C. Wolverton, J. Zhao and Z. Xia. Lead-Free Broadband Orange-Emitting Zero-Dimensional Hybrid (PMA)<sub>3</sub>InBr<sub>6</sub> with Direct Band Gap, *Inorg. Chem.*, 2019, **58**, 22, 15602-15609.
4. L. Yao, G. Niu, J. Li, L. Gao, X. Luo, B. Xia, Y. Liu, P. Du, D. Li, C. Chen, Y. Zheng, Z. Xiao and J. Tang, Circularly Polarized Luminescence from Chiral Tetranuclear Copper(I) Iodide Clusters. *J. Phys. Chem. Lett.* **2020**, 11, 1255-1260.
5. H. Peng, T. Huang, B. Zou, Y. Tian, X. Wang, Y. Guo, T. Dong, Z. Yu, C. Ding, F. Yang and J. Wang, Organic-Inorganic Hybrid Manganese Bromine Single Crystal with Dual-Band Photoluminescence from Polaronic and Bipolaronic Excitons. *Nano Energy*, 2021, **87**, 106166.
6. C. Zhou, H. Lin, Y. Tian, Z. Yuan, R. Clark, B. Chen, L. J. van de Burgt, J. C. Wang, Y. Zhou, K. Hanson, Q. J. Meisner, J. Neu, T. Besara, T. Siegrist, E. Lambers, P. Djurovich and B. Ma, Luminescent Zero-Dimensional Organic Metal Halide Hybrids with Near-Unity Quantum Efficiency. *Chem. Sci.*, 2018, **9**, 586-593.
7. G. Song, M. Li, S. Zhang, N. Wang, P. Gong, Z. Xia and Z. Lin, Enhancing Photoluminescence Quantum Yield in 0D Metal Halides by Introducing Water Molecules. *Adv. Funct. Mater.*, 2020, **30**, 2002468.
8. Y. Jing, Y. Liu, J. Zhao and Z. Xia, Sb<sup>3+</sup> Doping-Induced Triplet Self-Trapped Excitons Emission in Lead-Free Cs<sub>2</sub>SnCl<sub>6</sub> Nanocrystals. *J. Phys. Chem. Lett.*, 2019, **10**, 7439-7444.
9. D. Chen, G. Fang and X. Chen. Silica-Coated Mn-Doped CsPb(Cl/Br)<sub>3</sub> Inorganic Perovskite Quantum Dots: Exciton-to-Mn Energy Transfer and Blue-Excitable Solid-State Lighting. *ACS Appl. Mater. Interfaces*, 2017, **9**, 40477-40487.
10. F. Locardi, M. Cirignano, D. Baranov, Z. Dang, M. Prato, F. Drago, M. Ferretti, V. Pinchetti, M. Fanciulli, S. Brovelli, L. D. Trizio and L. Manna. Colloidal Synthesis of Double Perovskite Cs<sub>2</sub>AgInCl<sub>6</sub> and Mn-Doped Cs<sub>2</sub>AgInCl<sub>6</sub> Nanocrystals. *J. Am. Chem. Soc.*, 2018, **140**, 12989-12995.
11. J.-H. Wei, J.-F. Liao, X.-D. Wang, L. Zhou, Y. Jiang and D.-B. Kuang, All-Inorganic Lead-Free Heterometallic Cs<sub>4</sub>MnBi<sub>2</sub>Cl<sub>12</sub> Perovskite Single Crystal with Highly Efficient Orange Emission. *Matter*, 2020, **3**, 892-903.
